# Supplementary material for: The PAX3-FOXO1 Fusion Protein Present in Rhabdomyosarcoma Interferes with Normal FOXO Activity and the TGF-β Pathway
Source: PubMed Central journal article supplement (PMC4373809; doi:10.1371/journal.pone.0121474), 2015-03-25
Supplement: pone.0121474.s004.pdf [file pone.0121474.s004.pdf]

|                                  |                                                                                                                                                             |
|----------------------------------|-------------------------------------------------------------------------------------------------------------------------------------------------------------|
|                                  | <b>For cloning</b>                                                                                                                                          |
| 2XSFRE-upper                     | 5'-CTAGCCCAAAGTAAACAGACAGACAATGTCTAGTCTATTTCCC<br>AAAGTAAACAGACAGACAATGTCTAGTCTATTTA-3'                                                                     |
| 2XSFRE-lower                     | 5'-GATCTAAATAGACTAGACATTGTCTGTCTGTTTACTTTGGGAAAT<br>AGACTAGACATTGTCTGTCTGTTTACTTTGGG-3'                                                                     |
| 4XSFRE-Synt                      | 5'-CGCGCTAGCCCAAAGTAAACAGACAGACAATGTCTAGTCTATTTCC<br>CAAAGTAAACAGACAGACAATGTCTAGTCTATTTCC-3'                                                                |
| pGL2-rev                         | 5'-CTTTATGTTTTTGGCGTCTTCCA-3'                                                                                                                               |
|                                  | <b>For Real-Time PCR</b>                                                                                                                                    |
| BETA-ACTIN<br>ACTB<br>ID: 60     | F: 5'-TGAAGATCAAGATCATTGCTCCTC-3'<br>R: 5'-CACATCTGCTGGAAGGTGGAC-3'                                                                                         |
| TBP<br>ID: 6908                  | F: 5'-TGTGCACAGGAGCCAAGAGT-3'<br>R: 5'-ATTTTCTTGCTGCCAGTCTGG-3'                                                                                             |
| P21CIP1<br>(CDKN1A)<br>ID: 1026  | F: 5'-GAGACTCTCAGGGTCGAAAACG-3'<br>R: 5'-ATTAGGGCTTCCTCTTGGAAGAAG-3'                                                                                        |
| SMAD7<br>ID: 4092                | F: 5'-CCTTAGCCGACTCTGCGAACTA-3'<br>R: 5'-CCAGATAATTCGTTCCCCCTGT-3'                                                                                          |
| PAI-1<br>(SERPINE1)<br>ID: 5054  | F: 5'-CCTCATCCACAGCTGTCATAGTCT-3'<br>R: 5'-GGCCCATGAAAAGGACTGTTC-3'                                                                                         |
| PAX3-FOXO1                       | F: 5'-AATGGCCTCTCACCTCAGAATTC-3'<br>R: 5'-CTTGCCACCCTCTGGATTGA-3'                                                                                           |
| P15INK4B<br>(CDKN2B)<br>ID: 1030 | Primer 1<br>F: 5'-AGTGGAGAAGGTGCGACAGCT-3'<br>R: 5'-CCATCATCATGACCTGGATCG-3'<br>Primer 2<br>F: 5'-CCAACGGAGTCAACCGTTTC-3'<br>R: 5'-CCCATCATCATGACCTGGATC-3' |
| CTGF<br>ID: 1490                 | F: 5'-AAGAGAACATTAAGAAGGGCAAAAAG-3'<br>R: 5'-CAGCCAGAAAGCTCAAACCTGA-3'                                                                                      |
| ANGPTL4<br>ID: 51129             | F: 5'-GGCCTCTCCGTACCCTTCTC-3'<br>R: 5'-GGCCGTTGAGGTTGGAAT-3'                                                                                                |
| GADD45B<br>ID: 4616              | F: 5'-CGGTGGAGGAGCTTTTGGT-3'<br>R: 3'-GCTGTCTGGGTCCACATTCA-3'                                                                                               |
| FOXO1<br>ID: 2308                | F: 5'-ATGGTCAAGAGCGTGCCCTA-3'<br>R: 5'-TGTGTAGGGACAGATTATGACGAATT-3'                                                                                        |
| SGK1<br>ID: 6446                 | F: 5'-GCATGCAAACACCCTGAAGTT-3'<br>R: 5'-GAAGGGTTGGCATTATAAGCT-3'                                                                                            |
| PAX3<br>ID: 5077                 | F: 5'-AACCCACCATTGGCAATG-3'<br>R: 5'-CACCGTGGTTGGTCAGGAGT-3'                                                                                                |
| IER3<br>ID: 8870                 | F: 5'-CCGCAGGGTTCTCTACCC-3'<br>R: 5'-GGATCTGGCAGAAGACGATG-3'                                                                                                |
| MYOD1<br>ID: 4654                | F: 5'-TGCCACAACGGACGACTTC-3'<br>R: 5'-CGGGTCCAGGTCTTCGAA-3'                                                                                                 |

|                  |                                                                              |
|------------------|------------------------------------------------------------------------------|
| MYOG<br>ID: 4656 | F: 5'-GCTCACGGCTGACCCTACA-3'<br>R: 5'-AGACACATCTTCCACTGTGATGCT-3'            |
|                  | <b>For siRNA</b>                                                             |
| siCON            | Sense: 5'-CUACUAUACCGAUACUCCCTT-3'<br>Antisense: 5'-GGGAGUAUCGGUAGUAGTT-3'   |
| siPF             | Sense: 5'-CCUCUCACCUCAGAAUUCATT-3'<br>Antisense: 5'-UGAAUUCUGAGGUGAGAGGTT-3' |
